# Supplementary material for: The effect of the TiO2 interface layer on the electrochromic properties of WO3-based devices
Source: Royal Society of Chemistry journal article supplement (doi:10.1039/d3ma00272a), 2023-01-01
Supplement: d3ma00272a1.pdf [file d3ma00272a1.pdf]

## Supplementary Information

### The effect of TiO<sub>2</sub> interface layer on electrochromic properties of WO<sub>3</sub> based devices

Panshu Gui,<sup>‡a</sup> Ziyi Jin, <sup>‡a</sup> Yufeng Bai,<sup>a</sup> Zhengqiao Lv,<sup>a</sup> Jianwei Mo,<sup>a</sup> Shuai Chang,<sup>b</sup> Di Yang<sup>\*a</sup>

<sup>a</sup> School of Science, Minzu University of China, Beijing 100081, China.

<sup>b</sup> Department of Materials Science, Shenzhen MSU-BIT University, Shenzhen, China.

<sup>‡</sup>Equal contribution.

\*Correspondence: diyang@muc.edu.cn; Tel.: +86-1352-274-3208

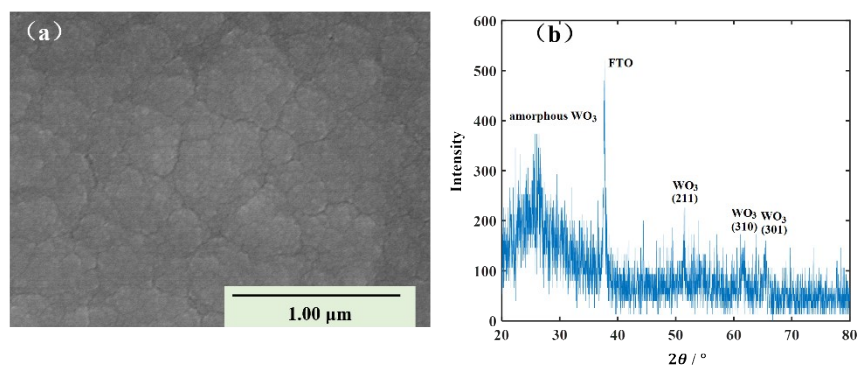

Figure S1. (a) SEM micrograph of WO<sub>3</sub>/TiO<sub>2</sub>\_2 min; (b) XRD pattern of WO<sub>3</sub>/TiO<sub>2</sub>\_2 min

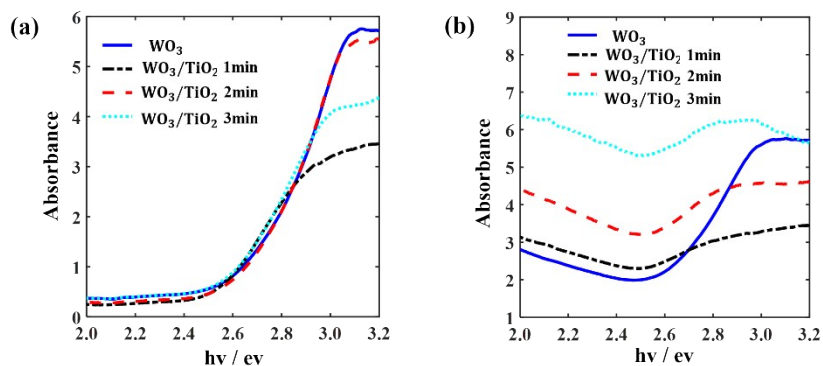

Figure S2. The absorption spectra near of the energy band edge of these EC films in the bleached (a) and colored states (b)

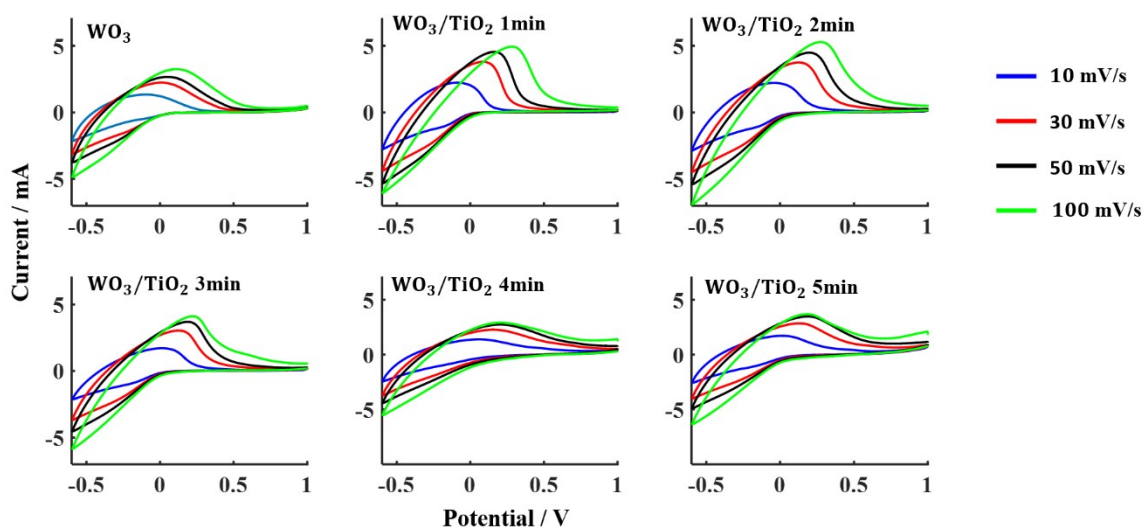

Figure S3. Cyclic voltammograms over the potential range of from  $-0.6$  V to  $1.0$  V at a scan rate of  $10$  mV/s,  $30$  mV/s,  $50$  mV/s, and  $100$  mV/s for EC devices based on different electrochromic films

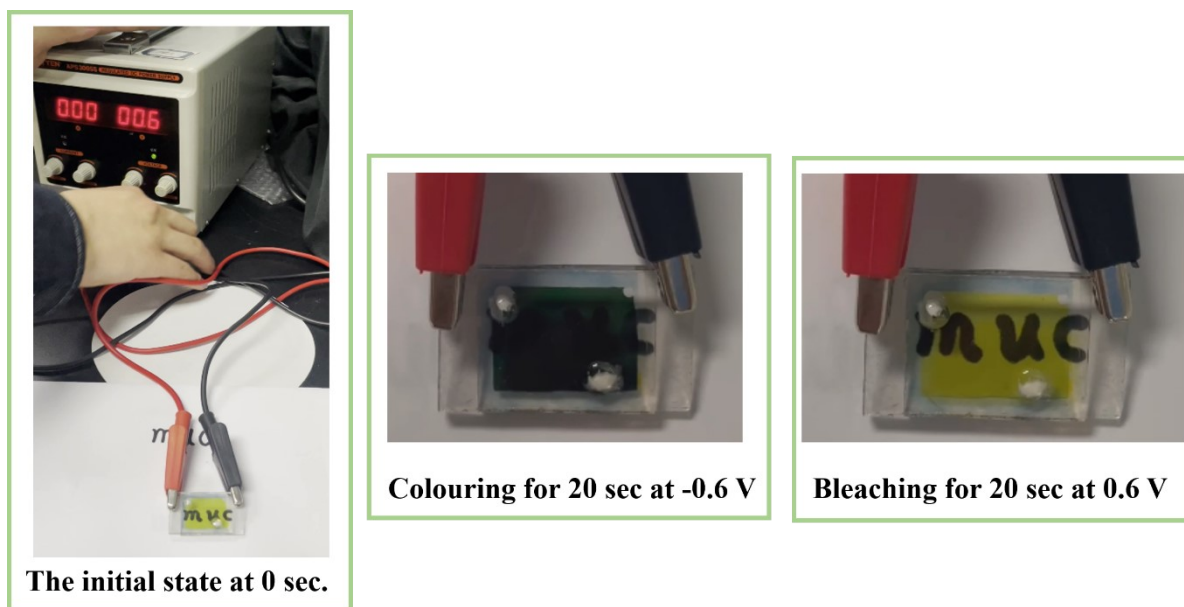

Figure S4. Photos of the EC device based on  $\text{WO}_3/\text{TiO}_2$ \_2min film in the initial state, coloured state and bleached state.

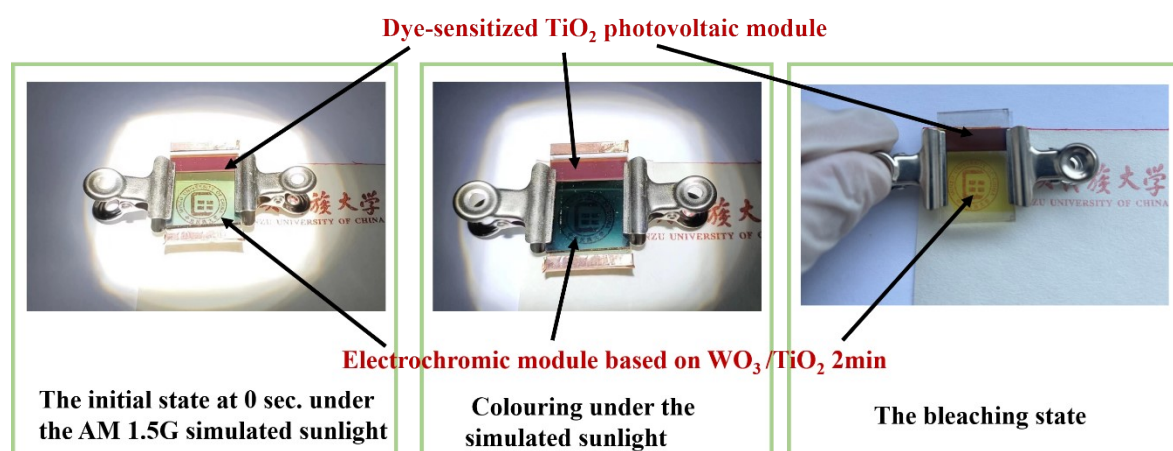

Figure S5. Photos of the PEC device in the initial state, coloured state and bleached state.
